# Supplementary material for: Prognostic Significance of the Bone Marrow-to-Aorta Uptake Ratio on 2-Deoxy-2-[18F]fluoro-d-glucose Positron Emission Tomography/Computed Tomography in Patients with Cholangiocarcinoma
Source: MDPI journal article supplement (doi:10.3390/biomedicines12050944), 2024-04-24

**Table S1.** Correlation analysis of FDG PET/CT parameters of reticuloendothelial system with tumor classification.

| Variables         | Intrahepatic<br>cholangiocarcinoma<br>(n=23) | Perihilar<br>cholangiocarcinoma<br>(n=60) | Distal bile duct cancer<br>(n=55) | P-value       |
|-------------------|----------------------------------------------|-------------------------------------------|-----------------------------------|---------------|
| BM SUV            | 2.12 (1.78–2.36)                             | 2.00 (1.77–2.54)                          | 2.21 (1.85–2.52)                  | 0.672         |
| <b>Liver SUV</b>  | <b>2.32 (2.15–2.63)</b>                      | <b>2.63 (2.20–3.01)</b>                   | 2.48 (2.22–2.83)                  | <b>0.034*</b> |
| <b>Spleen SUV</b> | <b>1.91 (1.77–2.04)</b>                      | <b>2.25 (1.81–2.57)</b>                   | 2.18 (1.88–2.42)                  | <b>0.026*</b> |
| BAR               | 1.27 (1.09–1.52)                             | 1.16 (1.00–1.37)                          | 1.21 (1.09–1.31)                  | 0.352         |
| LAR               | 1.39 (1.27–1.48)                             | 1.42 (1.30–1.52)                          | 1.36 (1.29–1.46)                  | 0.467         |
| SAR               | 1.18 (1.03–1.28)                             | 1.23 (1.06–1.38)                          | 1.16 (1.06–1.29)                  | 0.358         |
| BLR               | 0.91 (0.80–1.03)                             | 0.82 (0.71–0.95)                          | 0.88 (0.78–0.97)                  | 0.127         |
| SLR               | 0.83 (0.76–0.91)                             | 0.86 (0.77–0.92)                          | 0.85 (0.78–0.94)                  | 0.709         |

Expressed in median (interquartile range)

\*On post-hoc analysis, there were significant differences of liver SUV and spleen SUV between patients with intrahepatic and perihilar cholangiocarcinoma ( $p < 0.05$ ).

BAR, bone marrow-to-aorta uptake ratio; BLR, bone marrow-to-liver uptake ratio; BM, bone marrow; LAR, liver-to-aorta uptake ratio; SAR, spleen-to-aorta uptake ratio; SLR, spleen-to-liver uptake ratio; SUV, standardized uptake ratio

**Table S2.** Correlation analysis of FDG PET/CT parameters of reticuloendothelial system with TNM stage.

| Variables  | P-value      | Correlation<br>Coefficient | Stage I                 | Stage II                | Stage III               | Stage IV                |
|------------|--------------|----------------------------|-------------------------|-------------------------|-------------------------|-------------------------|
| BM SUV     | 0.167        | 0.195                      | 2.02 (1.53–2.48)        | 2.13 (1.78–2.44)        | 2.14 (1.88–2.59)        | 2.15 (1.79–2.62)        |
| Liver SUV  | 0.446        | -0.065                     | 2.57 (2.33–3.09)        | 2.46 (2.19–2.78)        | 2.70 (2.16–2.99)        | 2.24 (1.88–2.37)        |
| Spleen SUV | 0.684        | 0.135                      | 2.32 (1.90–2.53)        | 2.07 (1.77–2.32)        | 2.13 (1.92–2.58)        | 1.86 (1.65–2.14)        |
| <b>BAR</b> | <b>0.002</b> | <b>0.261</b>               | <b>0.99 (0.92–1.23)</b> | <b>1.21 (1.08–1.30)</b> | <b>1.15 (1.05–1.40)</b> | <b>1.47 (1.26–1.61)</b> |
| LAR        | 0.065        | 0.157                      | 1.33 (1.30–1.41)        | 1.37 (1.27–1.47)        | 1.44 (1.30–1.53)        | 1.41 (1.29–1.48)        |
| <b>SAR</b> | <b>0.011</b> | <b>0.216</b>               | <b>1.14 (1.03–1.16)</b> | <b>1.14 (1.05–1.32)</b> | <b>1.27 (1.08–1.42)</b> | <b>1.22 (1.16–1.30)</b> |
| <b>BLR</b> | <b>0.015</b> | <b>0.206</b>               | <b>0.71 (0.67–0.95)</b> | <b>0.86 (0.78–0.96)</b> | <b>0.84 (0.75–1.00)</b> | <b>1.02 (0.88–1.12)</b> |
| SLR        | 0.291        | 0.091                      | 0.83 (0.79–0.87)        | 0.83 (0.76–0.92)        | 0.87 (0.76–0.96)        | 0.84 (0.81–0.91)        |

Expressed in median (interquartile range)

BAR, bone marrow-to-aorta uptake ratio; BLR, bone marrow-to-liver uptake ratio; BM, bone marrow; LAR, liver-to-aorta uptake ratio; SAR, spleen-to-aorta uptake ratio; SLR, spleen-to-liver uptake ratio; SUV, standardized uptake ratio

**Table S3.** Correlation analysis of FDG PET/CT parameters of reticuloendothelial system with serum inflammatory makers.

| Variables  |                         | CRP              | WBC          | NLR          | PLR          |
|------------|-------------------------|------------------|--------------|--------------|--------------|
| BM SUV     | P-value                 | 0.978            | 0.230        | <b>0.017</b> | 0.597        |
|            | Correlation coefficient | 0.002            | 0.103        | <b>0.203</b> | 0.045        |
| Liver SUV  | P-value                 | <b>0.002</b>     | 0.324        | 0.885        | 0.629        |
|            | Correlation coefficient | <b>-0.314</b>    | -0.085       | 0.012        | -0.041       |
| Spleen SUV | P-value                 | 0.344            | 0.536        | 0.156        | 0.507        |
|            | Correlation coefficient | -0.081           | -0.053       | 0.121        | 0.057        |
| BAR        | P-value                 | <b>&lt;0.001</b> | <b>0.036</b> | <b>0.005</b> | <b>0.035</b> |
|            | Correlation coefficient | <b>0.292</b>     | <b>0.178</b> | <b>0.240</b> | <b>0.180</b> |
| LAR        | P-value                 | 0.646            | 0.914        | 0.270        | 0.095        |
|            | Correlation coefficient | 0.039            | 0.009        | 0.094        | 0.143        |
| SAR        | P-value                 | <b>0.002</b>     | 0.771        | <b>0.045</b> | <b>0.007</b> |
|            | Correlation coefficient | <b>0.264</b>     | -0.025       | <b>0.164</b> | <b>0.228</b> |
| BLR        | P-value                 | <b>&lt;0.001</b> | <b>0.037</b> | <b>0.007</b> | 0.187        |
|            | Correlation coefficient | <b>0.283</b>     | <b>0.178</b> | <b>0.230</b> | 0.113        |
| SLR        | P-value                 | <b>0.002</b>     | 0.960        | 0.123        | 0.053        |
|            | Correlation coefficient | <b>0.266</b>     | -0.004       | 0.132        | 0.165        |

BAR, bone marrow-to-aorta uptake ratio; BLR, bone marrow-to-liver uptake ratio; BM, bone marrow; CRP, C-reactive protein; LAR, liver-to-aorta uptake ratio; NLR, neutrophil-to-lymphocyte ratio; PLR, platelet-to-lymphocyte ratio; SAR, spleen-to-aorta uptake ratio; SLR, spleen-to-liver uptake ratio; SUV, standardized uptake ratio; WBC, white blood cell

**Figure S1.** Distribution of liver SUV (a) and spleen SUV (b) in patients with intrahepatic cholangiocarcinoma, perihilar cholangiocarcinoma, and distal bile duct cancer.

(SUV, standardized uptake value)

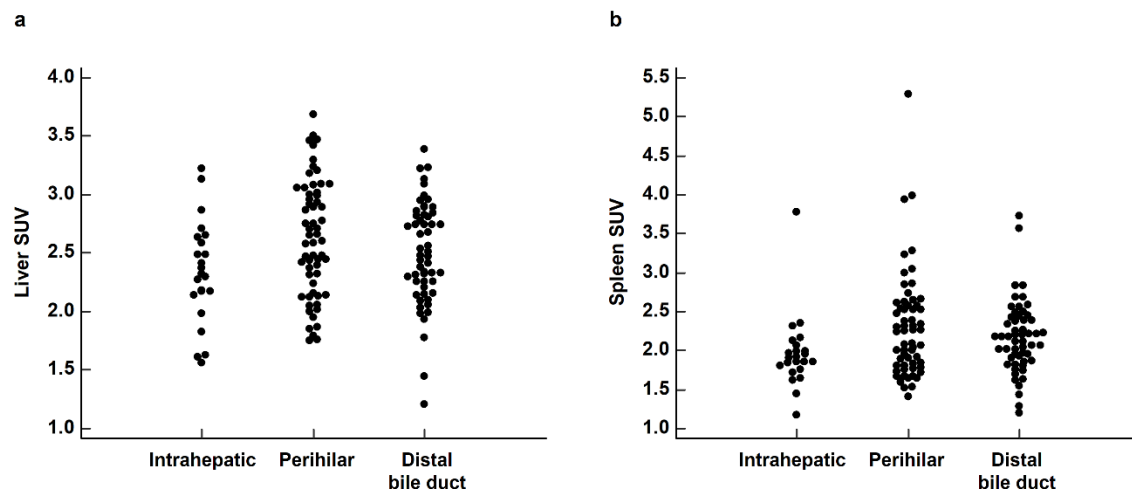

**Figure S2.** Distribution of BAR (a), SAR (b), and BLR (c) according to TNM stage.

(BAR, bone marrow-to-aorta uptake ratio; BLR, bone marrow-to-liver uptake ratio; SAR, spleen-to-aorta uptake ratio)

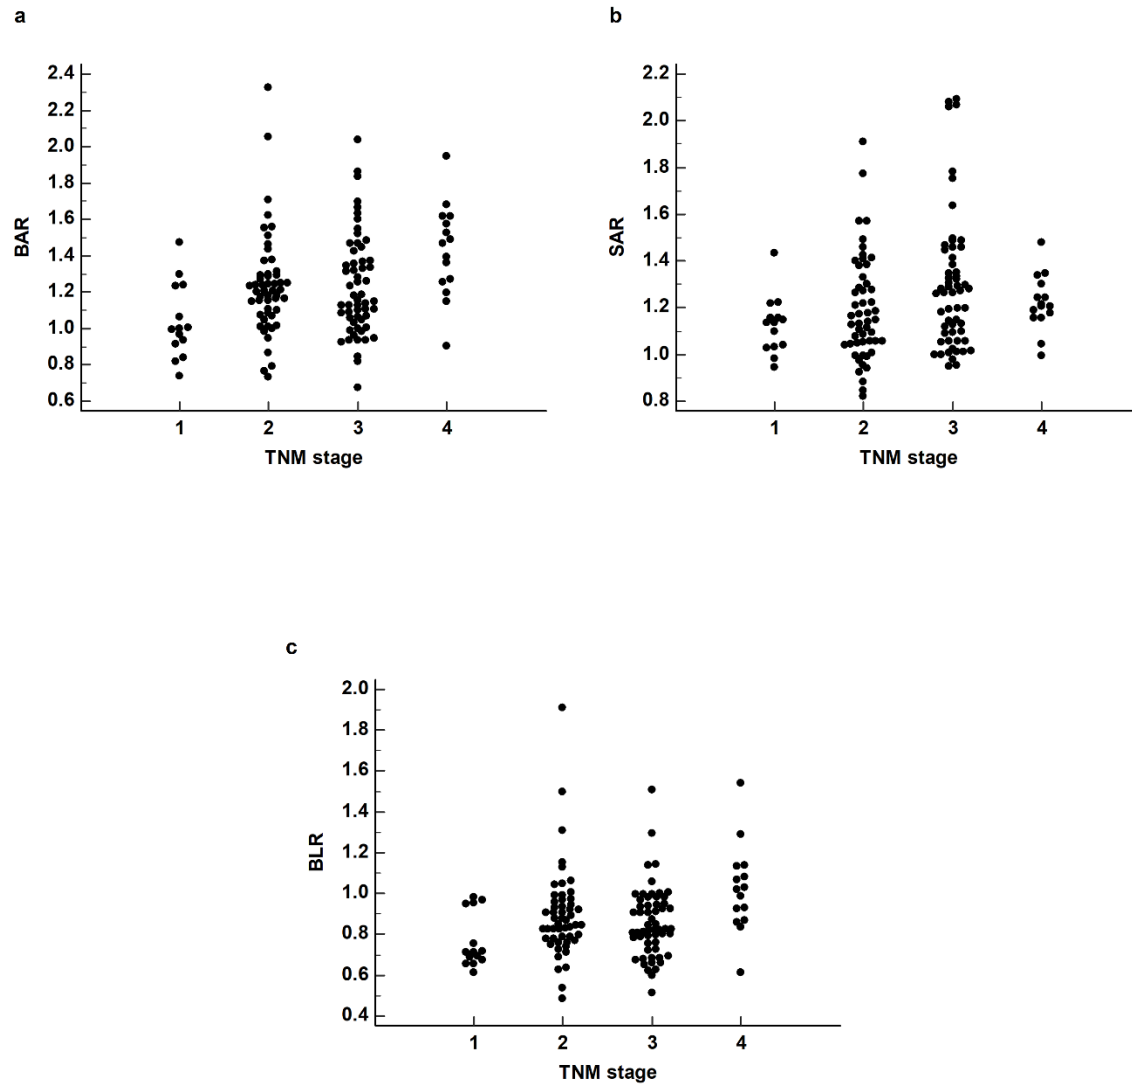

Supplement: s1 [file s1]
